# Supplementary material
Source: HighWire-hosted journal article supplement (https://rapm.bmj.com/content/46/1/49)

## Full blot images of samples in the Western blot study

Fig.1D

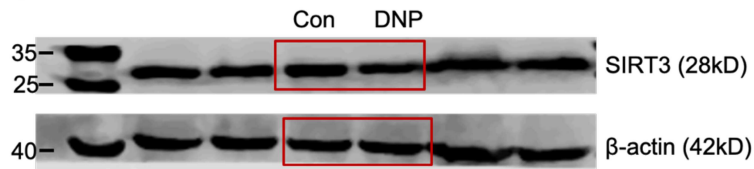

Fig.3A

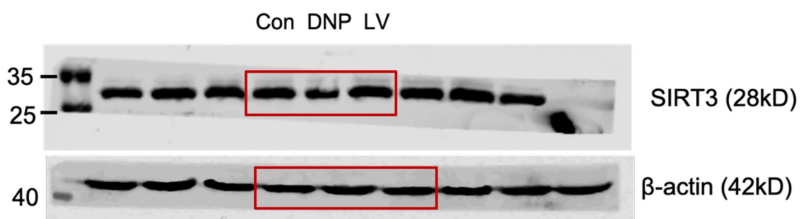

Fig.4A

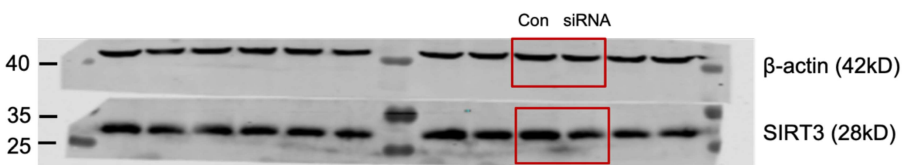

Fig.5A

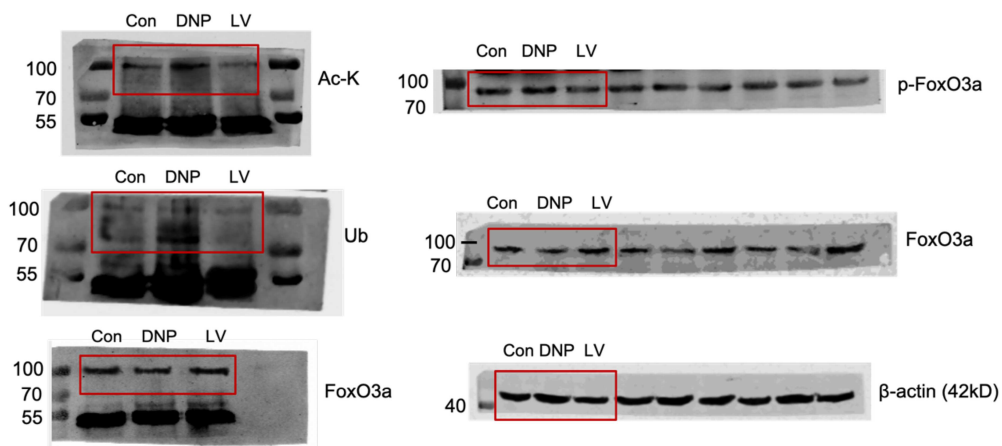

Fig.6A

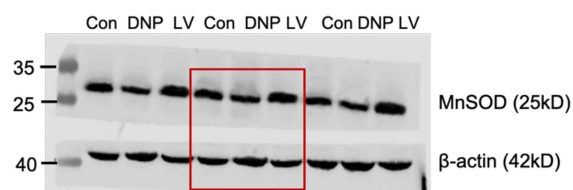

Fig.6C

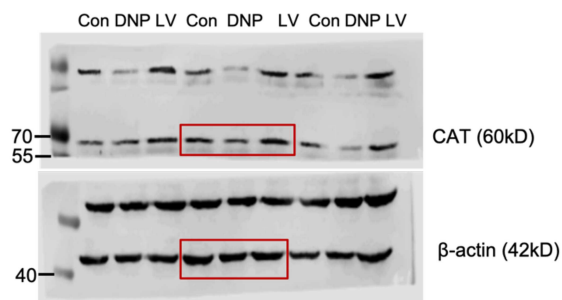

Fig.7A

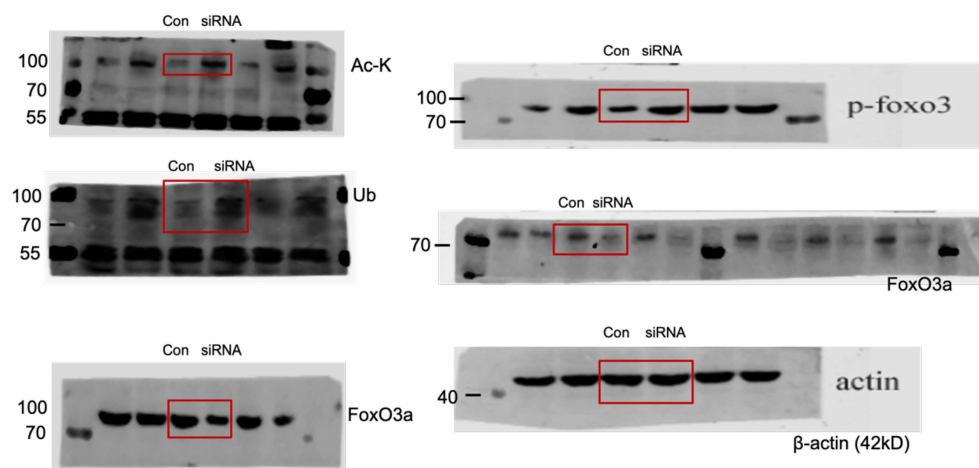

Fig.8A

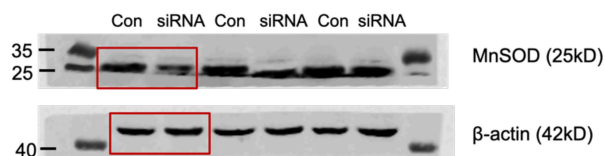

Fig.8C

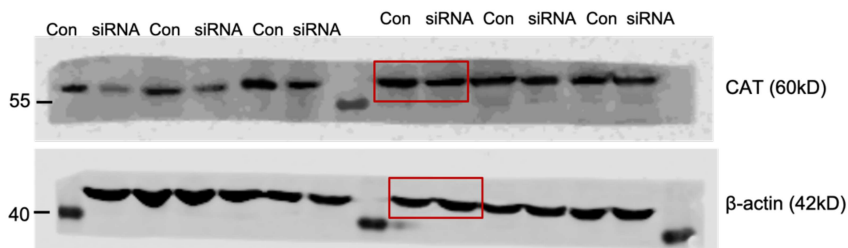

### Evidence demonstrating the specificity of antibody used in Western blot

(1) The specificity of anti-SIRT3 antibody (CST, 5490) was validated by the company. Please refer to the manufacturer's description: <https://www.cst-c.com.cn/products/primary-antibodies/sirt3-d22a3-rabbit-mab/5490>

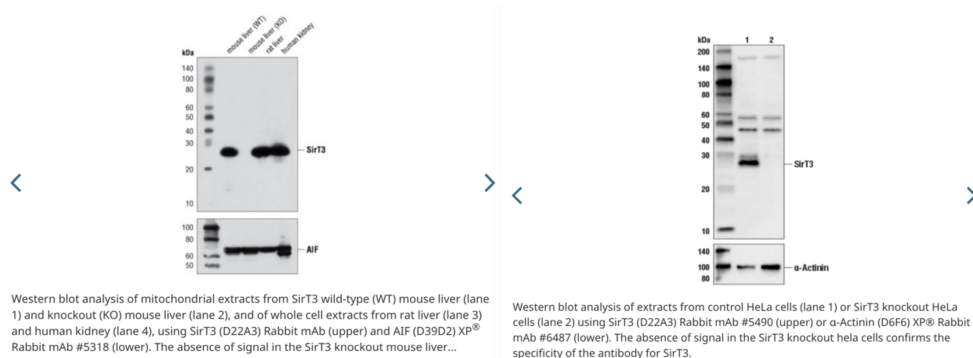

(2) The specificity of anti-Catalase antibody (Abcam, ab209211) was validated by the company. Please refer to the manufacturer's description: <https://www.abcam.cn/catalase-antibody-epr20198-ab209211.html>

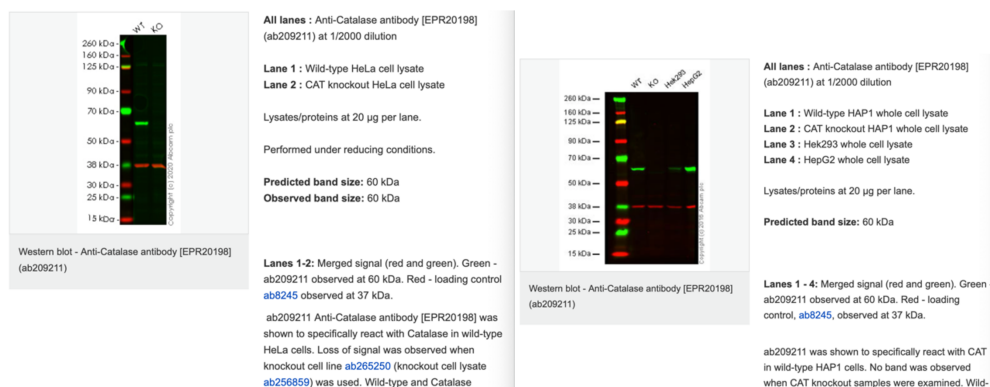

(3) The specificity of anti-SOD2/MnSOD antibody (Abcam, ab68155) was validated by the company. Please refer to the manufacturer's description: <https://www.abcam.cn/sod2mnsod-antibody-epr2560y-ab68155.html>

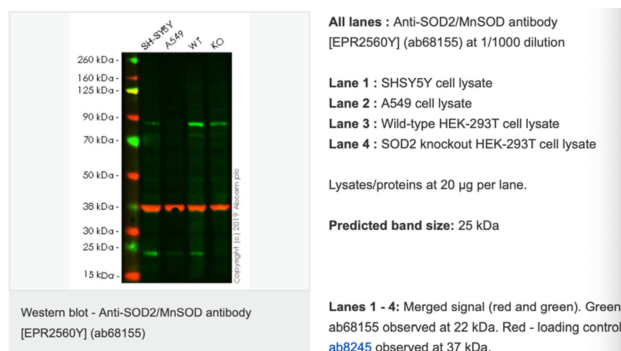

(4) The specificity of anti-acetylated lysine antibody (CST, 9441) was validated by the company. Please refer to the manufacturer's description: <https://www.cst.com.cn/products/primary-antibodies/acetylated-lysine-antibody/9441>

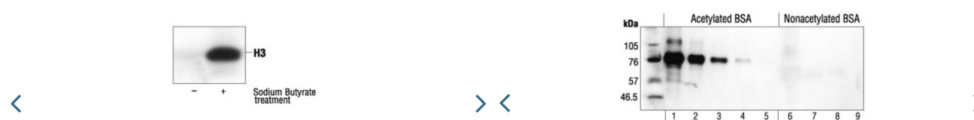

Western blot analysis of extracts from NIH/3T3 cells, untreated or sodium butyrate-treated (5 mM for 24 hours), showing an increase in histone acetylation using Acetylated-Lysine Antibody.

Specificity and sensitivity of Acetylated-Lysine Antibody assayed on acetylated BSA (4; 1; 0.2; 0.04 or 0.008 ng in lanes 1-5) or nonacetylated BSA (25,000; 5,000; 1,000 or 200 ng in lanes 6-9).

(5) The specificity of anti-FoxO3a antibody (CST, 2497) was validated by the company. Please refer to the manufacturer's description: <https://www.cst.com.cn/products/primary-antibodies/foxo3a-75d8-rabbit-mab/2497>

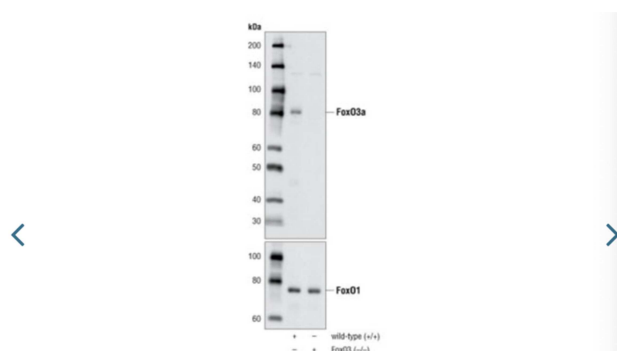

Western blot analysis of extracts from wild type (+/+) and FoxO3 knock-out (-/-) mouse brain, using FoxO3a (75D8) Rabbit mAb (upper) and FoxO1 (C29H4) Rabbit mAb #2880 (lower). (FoxO3 knock-out (-/-) mouse brain was kindly provided by Dr. Ron DePinho, Dana-Farber Cancer Institute, Boston, MA).

(6) The specificity of anti-phospho-FoxO3a antibody (CST, 9466) was validated by the company. Please refer to the manufacturer's description: <https://www.cst.com.cn/products/primary-antibodies/phospho-foxo3a-ser253-antibody/9466>

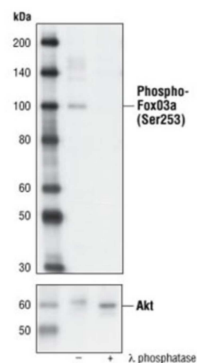

Western blot analysis of extracts from PC3 cells, untreated or treated with lambda phosphatase, using Phospho-FoxO3a (Ser253) Antibody (upper) or Akt Antibody #9272 (lower).

(7) The specificity of anti-ubiquitin antibody (Abcam, ab7780) was validated by the company. Please refer to the manufacturer's description: <https://www.abcam.com/ubiquitin-antibody-ab7780.html>

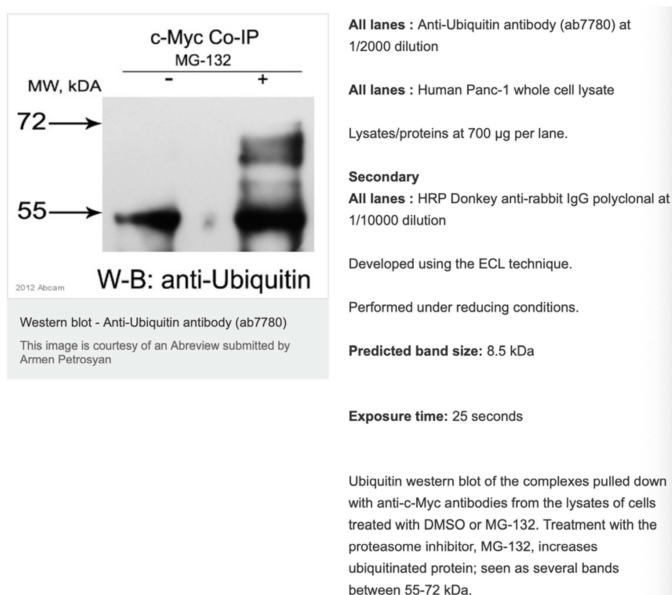

Supplement: inline-supplementary-material-1 [file inline-supplementary-material-1.pdf]
